# Supplementary material for: Xenopus Dab2 is required for embryonic angiogenesis
Source: PubMed Central journal article supplement (PMC1766927; doi:10.1186/1471-213x-6-63), 2006-12-19
Supplement: 1471-213X-6-63-S1.pdf [file 1471-213X-6-63-S1.pdf]

A

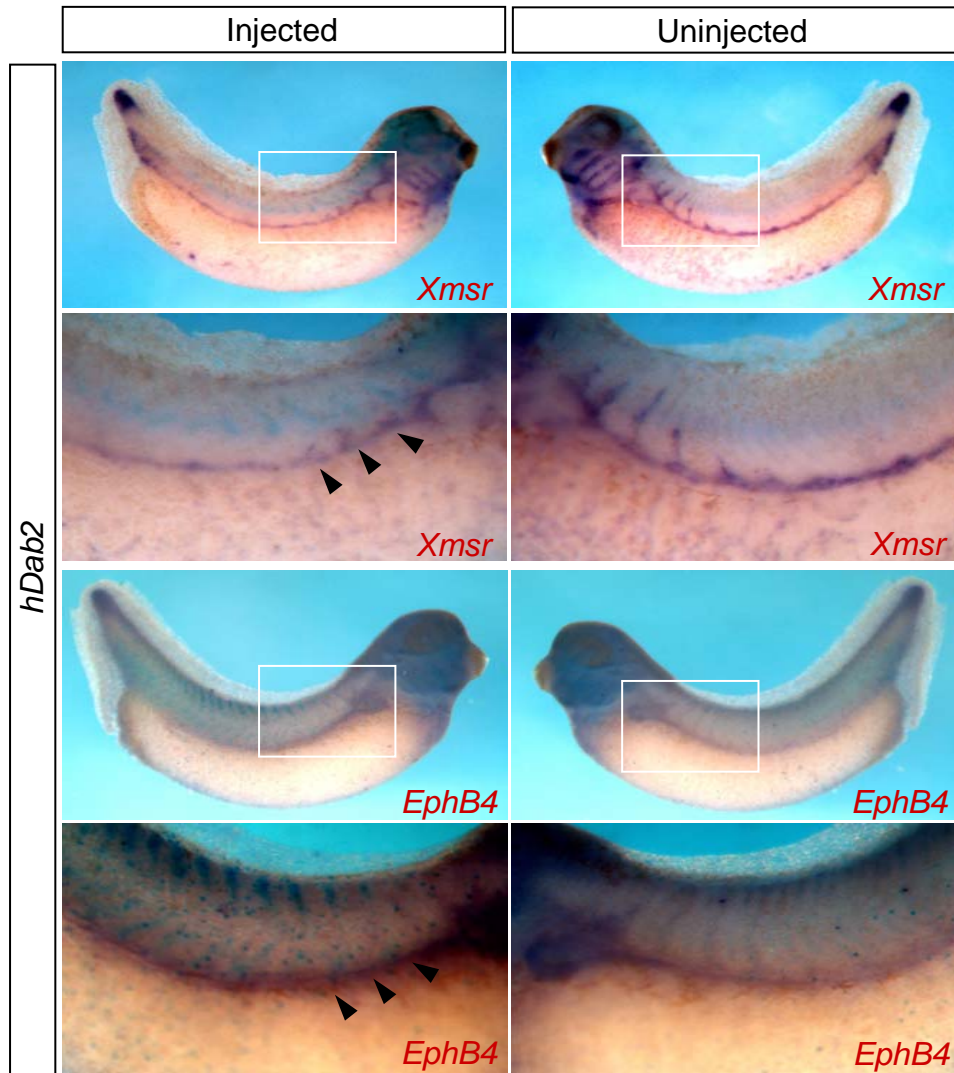

B

| probe        | RNA          | No. of embryos with angiogenic defect | No. of embryos analyzed | %    |
|--------------|--------------|---------------------------------------|-------------------------|------|
| <i>Xmsr</i>  | <i>β-gal</i> | 1                                     | 13                      | 7.7  |
|              | <i>hDab2</i> | 13                                    | 32                      | 40.6 |
| <i>EphB4</i> | <i>β-gal</i> | 2                                     | 19                      | 10.5 |
|              | <i>hDab2</i> | 9                                     | 19                      | 47.4 |
