# Supplementary material for: Xenopus Dab2 is required for embryonic angiogenesis
Source: PubMed Central journal article supplement (PMC1766927; doi:10.1186/1471-213x-6-63), 2006-12-19

A

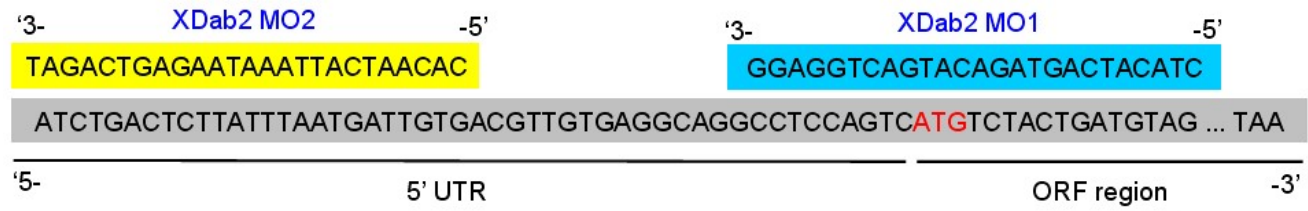

B

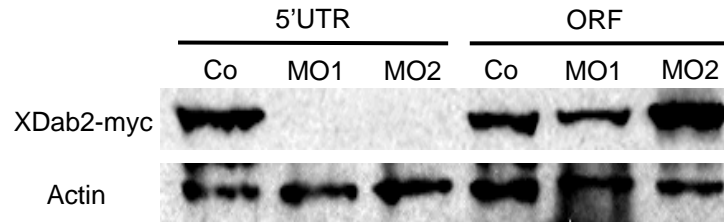

Supplement: 1471-213X-6-63-S2.pdf [file 1471-213X-6-63-S2.pdf]
