# Supplementary material for: Xenopus Dab2 is required for embryonic angiogenesis
Source: PubMed Central journal article supplement (PMC1766927; doi:10.1186/1471-213x-6-63), 2006-12-19
Supplement: 1471-213X-6-63-S3.pdf [file 1471-213X-6-63-S3.pdf]

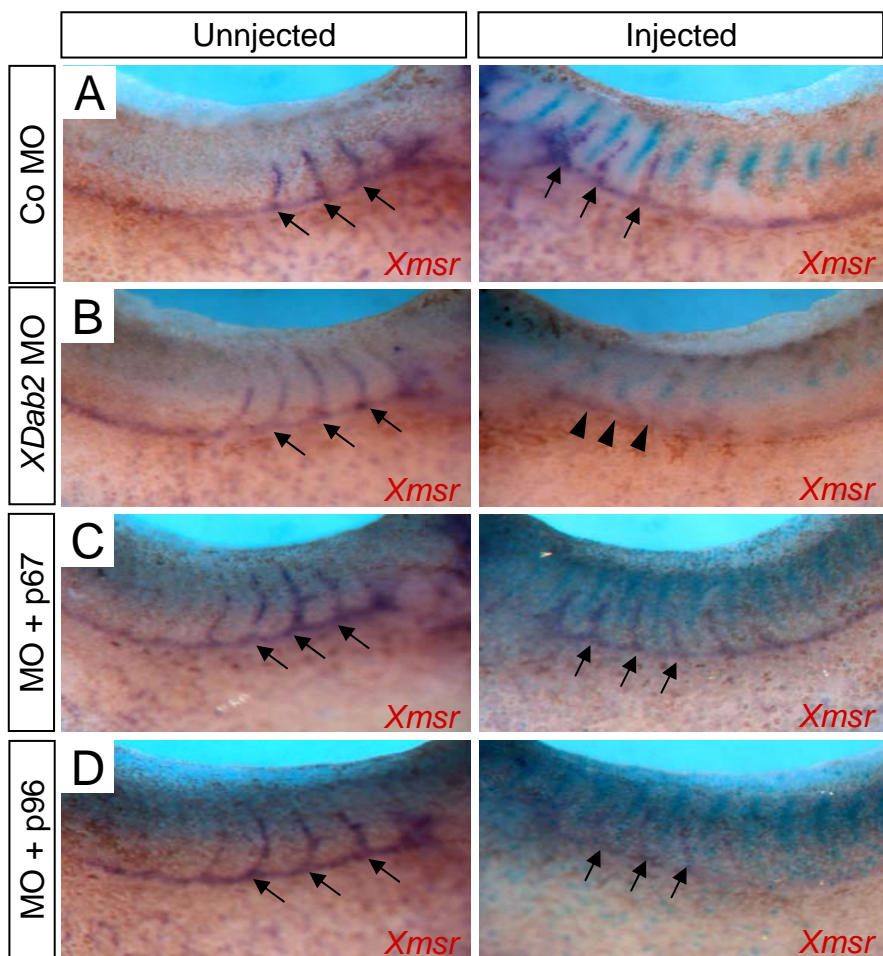

**E**

|                      | No. of embryos with angiogenic defect | No. of embryos analyzed | %    |
|----------------------|---------------------------------------|-------------------------|------|
| Co MO                | 2                                     | 35                      | 5.7  |
| <i>XDab2</i> MO      | 19                                    | 26                      | 73.1 |
| MO+ <i>mDab2 p67</i> | 10                                    | 24                      | 41.7 |
| MO+ <i>mDab2 p96</i> | 13                                    | 29                      | 44.8 |

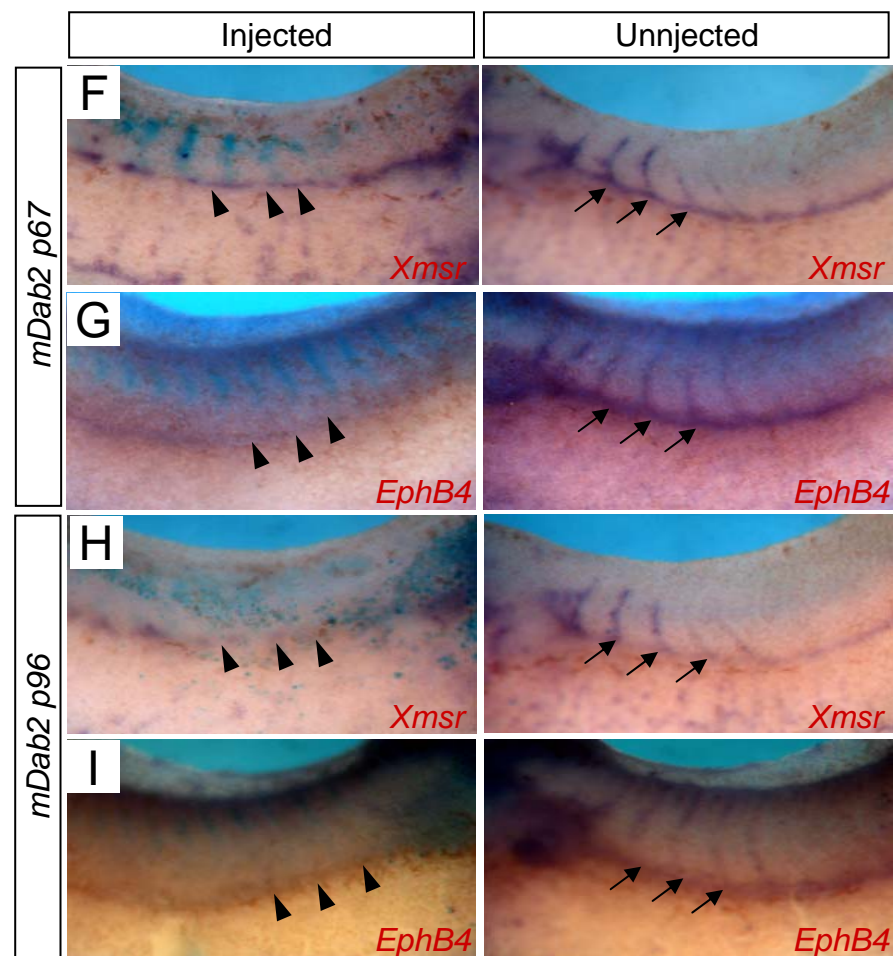

**J**

| probe        | RNA              | No. of embryos with angiogenic defect | No. of embryos analyzed | %    |
|--------------|------------------|---------------------------------------|-------------------------|------|
| <i>Xmsr</i>  | $\beta$ -gal     | 2                                     | 37                      | 5.4  |
|              | <i>mDab2 p67</i> | 8                                     | 15                      | 53.3 |
|              | <i>mDab2 p96</i> | 10                                    | 21                      | 47.6 |
| <i>EphB4</i> | $\beta$ -gal     | 2                                     | 28                      | 7.1  |
|              | <i>mDab2 p67</i> | 9                                     | 17                      | 52.9 |
|              | <i>mDab2 p96</i> | 12                                    | 23                      | 52.2 |
